# Supplementary material for: Stable representation of a naturalistic movie emerges from episodic activity with gain variability
Source: PubMed Central journal article supplement (PMC8397750; doi:10.1038/s41467-021-25437-2), 2021-08-27
Supplement: 41467_2021_25437_MOESM3_ESM.pdf [file 41467_2021_25437_MOESM3_ESM.pdf]

## Description of Additional Supplementary Files

**Supplementary Software:** This zip file contains a modified version of the SPUD code (the original SPUD code is provided at <https://fietelab.mit.edu/code/>), an example dataset and a Jupyter notebook to reproduce some of the main figures.
